# Supplementary material
Source: publisher site journal article supplement (https://www.dovepress.com/get_supplementary_file.php?f=291723.docx)
Supplement: Supplementary file 1 [file get_supplementary_file.php]

Table 1 Multiplicative interaction between gender and genotype In the fasting study

|  | AUC0-t(h*ng/mL) | AUC0-∞(h*ng/mL) | Tmax(h) | Cmax(ng/mL) | t1/2(h) |
| --- | --- | --- | --- | --- | --- |
| Gender&CES1.rs2244613.c.1165.33C.A | 0.440 | 0.435 | 0.211 | 0.607 | 0.164 |
| Gender&CES1.rs8192935.c.257.885T.C | 0.205 | 0.197 | 0.225 | 0.413 | 0.759 |
| Gender&ABCB1.rs1045642.c.3435T.C | 0.820 | 0.739 | 0.662 | 0.665 | 0.036* |
| Gender&ABCB1.rs4148738.c.2482.2236G.A | 0.768 | 0.712 | 0.833 | 0.657 | 0.078 |
| Gender&ABCB1.rs2032582.c.2677T.A.G | 0.768 | 0.712 | 0.833 | 0.657 | 0.078 |

*p <0.05

Table2 Multiplicative interaction between gender and genotype In the fed study

|  | AUC0-t(h*ng/mL) | AUC0-∞(h*ng/mL) | Tmax(h) | Cmax(ng/mL) | t1/2(h) |
| --- | --- | --- | --- | --- | --- |
| Gender&CES1.rs2244613.c.1165.33C.A | 0.033* | 0.031* | 0.748 | 0.106 | 0.837 |
| Gender&CES1.rs8192935.c.257.885T.C | 0.455 | 0.446 | 0.451 | 0.881 | 0.838 |
| Gender&ABCB1.rs1045642.c.3435T.C | 0.247 | 0.253 | 0.696 | 0.322 | 0.932 |
| Gender&ABCB1.rs4148738.c.2482.2236G.A | 0.627 | 0.638 | 0.269 | 0.190 | 0.704 |
| Gender&ABCB1.rs2032582.c.2677T.A.G | 0.862 | 0.877 | 0.504 | 0.382 | 0.879 |

*p <0.05

Table 3. Pharmacokinetic parameters according to ABCB1 haplotypes (all the lower values were calculated as control group)

|  | **Case** | **Control** | **Chi2** | **Fisher’s P value** | **Pearson’s P vale** | **OR(95%CI)** |
| --- | --- | --- | --- | --- | --- | --- |
| **AUC0-t (h*ng/mL)** | |  |  |  |  |  |
| ACA | 43 | 41 | 0.161 | 0.688 | 0.688 | 1.121 [0.643~1.955] |
| ATA | 0 | 1 | - | - | - | - |
| ATC | 3 | 2 | 0.221 | 0.638 | 0.638 | 1.530 [0.257~9.115] |
| ATT | 0 | 1 | - | - | - | - |
| GCA | 3 | 4 | 0.133 | 0.715 | 0.715 | 0.756 [0.168~3.400] |
| GTC | 36 | 40 | 0.224 | 0.636 | 0.636 | 0.872 [0.495~1.537] |
| GTT | 17 | 17 | 0.005 | 0.946 | 0.946 | 1.026 [0.491~2.141] |
| **AUC0-∞ (h*ng/mL)** | |  |  |  |  |  |
| ACA | 43 | 41 | 0.399 | 0.528 | 0.528 | 1.196 [0.686~2.087] |
| ATA | 0 | 1 | - | - | - | - |
| ATC | 3 | 2 | 0.269 | 0.604 | 0.604 | 1.598 [0.268~9.524] |
| ATT | 0 | 1 | - | - | - | - |
| GCA | 3 | 4 | 0.096 | 0.757 | 0.757 | 0.789 [0.176~3.547] |
| GTC | 34 | 42 | 0.706 | 0.401 | 0.401 | 0.784 [0.444~1.384] |
| GTT | 17 | 17 | 0.037 | 0.848 | 0.848 | 1.075 [0.515~2.244] |
| **Tmax(h)** |  |  |  |  |  |  |
| ACA | 43 | 41 | 0.040 | 0.841 | 0.841 | 0.945 [0.542~1.648] |
| ATT | 0 | 1 | - | - | - | - |
| GCA | 4 | 3 | 0.108 | 0.743 | 0.743 | 1.285 [0.286~5.785] |
| GTC | 39 | 37 | 0.027 | 0.870 | 0.870 | 0.954 [0.541~1.681] |
| GTT | 16 | 18 | 0.383 | 0.536 | 0.536 | 0.793 [0.379~1.657] |
| ATA | 1 | 0 | - | - | - | - |
| ATC | 5 | 0 | 4.912 | 0.027 | 0.027 | - |
| **Cmax (ng/mL)** | |  |  |  |  |  |
| ACA | 48 | 36 | 2.388 | 0.122 | 0.122 | 1.560 [0.886~2.745] |
| ATA | 0 | 1 | - | - | - | - |
| ATC | 2 | 3 | - | - | - | - |
| ATT | 0 | 2 | - | - | - | - |
| GCA | 3 | 4 | 0.206 | 0.650 | 0.650 | 0.707 [0.157~3.184] |
| GTC | 38 | 38 | 0.060 | 0.807 | 0.807 | 0.931 [0.527~1.647] |
| GTT | 13 | 20 | 2.252 | 0.134 | 0.134 | 0.562 [0.263~1.200] |
| **t1/2(h)** |  |  |  |  |  |  |
| ACA | 42 | 42 | 0.002 | 0.964 | 0.964 | 0.987 [0.566~1.723] |
| ATA | 0 | 1 | - | - | - | - |
| ATC | 0 | 4 | 3.409 | 0.065 | 0.065 | 0.001 [0.000~0.013] |
| ATT | 1 | 1 | - | - | - | - |
| GCA | 4 | 3 | 0.112 | 0.738 | 0.738 | 1.292 [0.288~5.798] |
| GTC | 42 | 35 | 0.940 | 0.332 | 0.332 | 1.324 [0.751~2.334] |
| GTT | 15 | 18 | 0.363 | 0.547 | 0.547 | 0.795 [0.376~1.680] |

**Table 4. Mean pharmacokinetics parameters after single—dose administration of dabigatran etexilate 150mg reference (R) and trial preparation (T)**

| Parameter | Fasting conditions | | Fed conditions | |
| --- | --- | --- | --- | --- |
| Unconjugated dabigatran | T | R | T | R |
| Cmax(ng/mL) | 141.06±50.22 | 143.54±48.86 | 115.47±42.90 | 115.43±42.93 |
| AUC0-t(h*ng/mL） | 1165.4±399.9 | 1184.1±396.9 | 1056.9±327.5 | 1063.9±338.8 |
| AUC0-∞(h*ng/mL） | 1203.3±408.5 | 1222.4±402.4 | 1090.9±340.3 | 1094.7±347.3 |
| t1/2(h) | 10.710±3.145 | 10.949±3.971 | 9.465±2.088h | 9.232±2.068 |
| Tmax(h) | 2.0(1.5,4) | 2.5(1,4) | 4.50(2.5,12) | 4.50(2,12) |
| Total Dabigatran | T | R | T | R |
| Cmax(ng/mL) | 166.03±61.35 | 169.12±61.46 | 121.69±43.58 | 121.11±45.24 |
| AUC0-t(h*ng/mL） | 1333.6±481.3 | 1367.1±505.4 | 1118.9±333.2 | 1126.8±346.8 |
| AUC0-∞(h*ng/mL） | 1376.2±491.7 | 1411.6±517.0 | 1156.6±344.4 | 1159.5±356.5 |
| t1/2(h) | 10.760±2.740 | 11.046±3.509 | 9.709±2.127 | 9.359±1.485 |
| Tmax(h) | 2.0(1.5,4) | 2.5(1,4) | 4.50(3,12) | 4.50(2.5,12) |

**Table 5. Bioequivalence analysis of total dabigatran after single-dose administration of dabigatran etexilate 150mg of reference and trial preparation**

|  | | Fasting condition | Fed condition |
| --- | --- | --- | --- |
| 90% CI (%) | Cmax (ng/mL) | 93.70-106.32 | 95.27-107.03 |
| AUC0-t (ng•h/mL) | 93.32-105.00 | 96.84-102.37 |
| AUC0-∞ (ng•h/mL) | 93.32-104.59 | 97.31-102.77 |
| 90% CI of σWT/σWT | Cmax (ng/mL) | 0.65-0.98 | 0.66-1.15 |
| AUC0-t (ng•h/mL) | 0.64-0.97 | 0.53-0.92 |
| AUC0-∞ (ng•h/mL) | 0.65-0.99 | 0.52-0.91 |

CI indicates confidence interval

σWR intra-individual variability of reference preparation

σWT intra-individual variability of trial preparation.
